# Supplementary material for: Transition to Parenthood and Marital Satisfaction: A Meta-Analysis
Source: PubMed Central journal article supplement (PMC9350520; doi:10.3389/fpsyg.2022.901362), 2022-07-20
Supplement: Data_Sheet_1.pdf [file Data_Sheet_1.pdf]

*Studies included in meta-analysis*

- Ahmad, G., & Najam, N. (1998). A study of marital adjustment during first transition to parenthood. *Journal of Behavioural Sciences*, *9*(1-2), 67–86.
- Bäckström, C., Kåreholt, I., Thorstensson, S., Golsäter, M., & Mårtensson, L. B. (2018). Quality of couple relationship among first-time mothers and partners, during pregnancy and the first six months of parenthood. *Sexual & Reproductive Healthcare*, *17*, 56–64. <https://doi.org/10.1016/j.srhc.2018.07.001>
- Biehle, S. N., & Mickelson, K. D. (2012). First-time parents' expectations about the division of childcare and play. *Journal of Family Psychology*, *26*(1), 36–45. <https://doi.org/10.1037/a0026608>
- Bouchard, G., Boudreau, J., & Hébert, R. (2006). Transition to Parenthood and Conjugal Life: Comparisons Between Planned and Unplanned Pregnancies. *Journal of Family Issues*, *27*(11), 1512–1531. <https://doi.org/10.1177/0192513X06290855>
- Bower, D., Jia, R., Schoppe-Sullivan, S. J., Mangelsdorf, S. C., & Brown, G. L. (2013). Trajectories of couple relationship satisfaction in families with infants: The roles of parent gender, personality, and depression in first-time and experienced parents. *Journal of Social and Personal Relationships*, *30*(4), 389–409. <https://doi.org/10.1177/0265407512457656>
- Buist, A., Morse, C. A., & Durkin, S. (2003). Men's Adjustment to Fatherhood: Implications for Obstetric Health Care. *Journal of Obstetric, Gynecologic & Neonatal Nursing*, *32*(2), 172–180. <https://doi.org/10.1177/0884217503252127>
- Cairo, S., Darwiche, J., Tissot, H., Favez, N., Germond, M., Guex, P., de Roten, Y., Frascarolo, F., & Despland, J.-N. (2012). Family interactions in IVF families: Change over the transition to parenthood. *Journal of Reproductive and Infant Psychology*, *30*(1), 5–20. <https://doi.org/10.1080/02646838.2012.669830>

- Castellano, R., Velotti, P., Crowell, J. A., & Zavattini, G. C. (2014). The Role of Parents' Attachment Configurations at Childbirth on Marital Satisfaction and Conflict Strategies. *Journal of Child and Family Studies*, 23(6), 1011–1026. <https://doi.org/10.1007/s10826-013-9757-7>
- Christopher, C., Umemura, T., Mann, T., Jacobvitz, D., & Hazen, N. (2015). Marital Quality over the Transition to Parenthood as a Predictor of Coparenting. *Journal of Child and Family Studies*, 24(12), 3636–3651. <https://doi.org/10.1007/s10826-015-0172-0>
- Condon, J. T., Boyce, P., & Corkindale, C. J. (2004). The First-Time Fathers Study: A prospective study of the mental health and wellbeing of men during the transition to parenthood. *Australian and New Zealand Journal of Psychiatry*, 38(1–2), 56–64. <https://doi.org/10.1111/j.1440-1614.2004.01298.x>
- Coop Gordon, K., Roberson, P. N. E., Hughes, J. A., Khaddouma, A. M., Swamy, G. K., Noonan, D., Gonzalez, A. M., Fish, L., & Pollak, K. I. (2018). The Effects of a Couples-Based Health Behavior Intervention During Pregnancy on Latino Couples' Dyadic Satisfaction Postpartum. *Family Process*, 57(3), 629–648. <https://doi.org/10.1111/famp.12354>
- Cox, M. J., Paley, B., Burchinal, M., & Payne, C. C. (1999). Marital Perceptions and Interactions Across the Transition to Parenthood. *Journal of Marriage and the Family*, 61(3), 611. <https://doi.org/10.2307/353564>
- Don, B. P., & Mickelson, K. D. (2014). Relationship Satisfaction Trajectories Across the Transition to Parenthood Among Low-Risk Parents: Relationship Satisfaction Trajectories. *Journal of Marriage and Family*, 76(3), 677–692. <https://doi.org/10.1111/jomf.12111>
- Doss, B. D., Rhoades, G. K., Stanley, S. M., & Markman, H. J. (2009). The effect of the transition to parenthood on relationship quality: An 8-year prospective study. *Journal*

*of Personality and Social Psychology*, 96(3), 601–619.  
<https://doi.org/10.1037/a0013969>

Dulude, D., Bélanger, C., Wright, J., & Sabourin, S. (2002). High-risk pregnancies, psychological distress, and dyadic adjustment. *Journal of Reproductive and Infant Psychology*, 20(2), 101–123. <https://doi.org/10.1080/02646830220134612>

Dyrdal, G. M., Røysamb, E., Nes, R. B., & Vittersø, J. (2011). Can a Happy Relationship Predict a Happy Life? A Population-Based Study of Maternal Well-Being During the Life Transition of Pregnancy, Infancy, and Toddlerhood. *Journal of Happiness Studies*, 12(6), 947–962. <https://doi.org/10.1007/s10902-010-9238-2>

Feldman, S. S., & Nash, S. C. (1984). The transition from expectancy to parenthood: Impact of the firstborn child on men and women. *Sex Roles*, 11(1–2), 61–78.  
<https://doi.org/10.1007/BF00287441>

Figueiredo, B., Canário, C., Tendais, I., Pinto, T. M., Kenny, D. A., & Field, T. (2018). Couples' relationship affects mothers' and fathers' anxiety and depression trajectories over the transition to parenthood. *Journal of Affective Disorders*, 238, 204–212.  
<https://doi.org/10.1016/j.jad.2018.05.064>

Fillo, J., Simpson, J. A., Rholes, W. S., & Kohn, J. L. (2015). Dads doing diapers: Individual and relational outcomes associated with the division of childcare across the transition to parenthood. *Journal of Personality and Social Psychology*, 108(2), 298–316.  
<https://doi.org/10.1037/a0038572>

Gameiro, S., Nazaré, B., Fonseca, A., Moura-Ramos, M., Canavarro, M. C. (2011). Changes in marital congruence and quality of life across the transition to parenthood in couples who conceived spontaneously or with assisted reproductive technologies. *Fertility and Sterility*, 96(6), 1457–1462. <https://doi.org/10.1016/j.fertnstert.2011.09.003>

- Gjerdingen, D. K., & Center, B. (2002). A Randomized Controlled Trial Testing the Impact of a Support/Work-Planning Intervention on First-Time Parents' Health, Partner Relationship, and Work Responsibilities. *Behavioral Medicine*, 28(3), 84–91. <https://doi.org/10.1080/08964280209596045>
- Gou, L. H., Duerksen, K. N., & Woodin, E. M. (2019). Coercive control during the transition to parenthood: An overlooked factor in intimate partner violence and family wellbeing? *Aggressive Behavior*, 45(2), 139–150. <https://doi.org/10.1002/ab.21803>
- Grote, N. K., & Clark, M. S. (2001). Perceiving unfairness in the family: Cause or consequence of marital distress? *Journal of Personality and Social Psychology*, 80(2), 281–293. <https://doi.org/10.1037/0022-3514.80.2.281>
- Harwood, K., McLean, N., & Durkin, K. (2007). First-time mothers' expectations of parenthood: What happens when optimistic expectations are not matched by later experiences? *Developmental Psychology*, 43(1), 1–12. <https://doi.org/10.1037/0012-1649.43.1.1>
- Hirschberger, G., Srivastava, S., Marsh, P., Cowan, C. P., & Cowan, P. A. (2009). Attachment, marital satisfaction, and divorce during the first fifteen years of parenthood. *Personal Relationships*, 16(3), 401–420. <https://doi.org/10.1111/j.1475-6811.2009.01230.x>
- Hock, E., Schirtzinger, M. B., Lutz, M. B., & Widaman, K. (1995). Maternal depressive symptomatology over the transition to parenthood: Assessing the influence of marital satisfaction and marital sex role traditionalism. *Journal of Family Psychology*, 9(1), 79–88. <https://doi.org/10.1037/0893-3200.9.1.79>
- Kestler-Peleg, M., Lavenda, O., Keren-Leneman, S., & Ginzburg, K. (2019). Spousal Relationship (E) Quality and Adjustment to Motherhood in Israel. *Journal of Family Issues*, 40(11), 1561–1578. <https://doi.org/10.1177/0192513X19842590>

- Kurdek, L. A. (1998). The nature and predictors of the trajectory of change in marital quality over the first 4 years of marriage for first-married husbands and wives. *Journal of Family Psychology, 12*(4), 494–510. <https://doi.org/10.1037/0893-3200.12.4.494>
- Lawrence, E., Rothman, A. D., Cobb, R. J., Rothman, M. T., & Bradbury, T. N. (2008). Marital satisfaction across the transition to parenthood. *Journal of Family Psychology, 22*(1), 41–50. <https://doi.org/10.1037/0893-3200.22.1.41>
- Levy-Shiff, R. (1994). Individual and contextual correlates of marital change across the transition to parenthood. *Developmental Psychology, 30*(4), 591–601. <https://doi.org/10.1037/0012-1649.30.4.591>
- Lu, L. (2006). The transition to parenthood: Stress, resources, and gender differences in a Chinese society. *Journal of Community Psychology, 34*(4), 471–488. <https://doi.org/10.1002/jcop.20110>
- Markman, H. J., & Kadushin, F. S. (1986). Preventive effects of Lamaze training for first-time parents: A short-term longitudinal study. *Journal of Consulting and Clinical Psychology, 54*(6), 872–874. <https://doi.org/10.1037/0022-006X.54.6.872>
- Meijer, A. M., & van den Wittenboer, G. L. H. (2007). Contribution of infants' sleep and crying to marital relationship of first-time parent couples in the 1st year after childbirth. *Journal of Family Psychology, 21*(1), 49–57. <https://doi.org/10.1037/0893-3200.21.1.49>
- Mellingen, S., Torsheim, T., & Thuen, F. (2015). Effect of Prepregnancy Alcohol Consumption on Postpartum Relationship Satisfaction and Divorce among Norwegian Mothers. *Substance Abuse: Research and Treatment, 9*s2, SART.S23543. <https://doi.org/10.4137/SART.S23543>
- Menéndez, S., Hidalgo, M. V., Jiménez, L., & Moreno, M. C. (2011). Father Involvement and Marital Relationship during Transition to Parenthood: Differences between Dual and

- Single-Earner Families. *The Spanish Journal of Psychology*, 14(2), 639–647.  
[https://doi.org/10.5209/rev\\_SJOP.2011.v14.n2.12](https://doi.org/10.5209/rev_SJOP.2011.v14.n2.12)
- Mortensen, Ø., Torsheim, T., Melkevik, O., & Thuen, F. (2012). Adding a Baby to the Equation. Married and Cohabiting Women's Relationship Satisfaction in the Transition to Parenthood. *Family Process*, 51(1), 122–139.  
<https://doi.org/10.1111/j.1545-5300.2012.01384.x>
- Pancer, S. M., Pratt, M., Hunsberger, B., & Gallant, M. (2000). Thinking Ahead: Complexity of Expectations and the Transition to Parenthood. *Journal of Personality*, 68(2), 253–279. <https://doi.org/10.1111/1467-6494.00097>
- Porter, C. L., & Hsu, H.-C. (2003). First-time mothers' perceptions of efficacy during the transition to motherhood: Links to infant temperament. *Journal of Family Psychology*, 17(1), 54–64. <https://doi.org/10.1037/0893-3200.17.1.54>
- Rauch-Anderegg, V., Kuhn, R., Milek, A., Halford, W. K., & Bodenmann, G. (2020). Relationship Behaviors across the Transition to Parenthood. *Journal of Family Issues*, 41(4), 483–506. <https://doi.org/10.1177/0192513X19878864>
- Reid, C. A., Worthington, E. L., Garthe, R. C., Davis, D. E., Hook, J. N., Van Tongeren, D. R., & Griffin, B. J. (2018). Actor–partner interdependence of humility and relationship quality among couples transitioning to parenthood. *The Journal of Positive Psychology*, 13(2), 122–132. <https://doi.org/10.1080/17439760.2016.1233349>
- Rholes, W. S., Eller, J., Simpson, J. A., & Arriaga, X. B. (2021). Support Processes Predict Declines in Attachment Avoidance Across the Transition to Parenthood. *Personality and Social Psychology Bulletin*, 47(5), 810–825.  
<https://doi.org/10.1177/0146167220948706>

- Rholes, W. S., Simpson, J. A., Campbell, L., & Grich, J. (2001). Adult attachment and the transition to parenthood. *Journal of Personality and Social Psychology*, *81*(3), 421–435. <https://doi.org/10.1037/0022-3514.81.3.421>
- Schulz, M. S., Cowan, C. P., & Cowan, P. A. (2006). Promoting healthy beginnings: A randomized controlled trial of a preventive intervention to preserve marital quality during the transition to parenthood. *Journal of Consulting and Clinical Psychology*, *74*(1), 20–31. <https://doi.org/10.1037/0022-006X.74.1.20>
- Simonelli, A., Parolin, M., Sacchi, C., De Palo, F., & Vieno, A. (2016). The Role of Father Involvement and Marital Satisfaction in the Development of Family Interactive Abilities: A Multilevel Approach. *Frontiers in Psychology*, *7*. <https://doi.org/10.3389/fpsyg.2016.01725>
- Terry, D. J., McHugh, T. A., & Noller, P. (1991). Role dissatisfaction and the decline in marital quality across the transition to parenthood. *Australian Journal of Psychology*, *43*(3), 129–132. <https://doi.org/10.1080/00049539108260136>
- Trillingsgaard, T., Baucom, K. J. W., & Heyman, R. E. (2014). Predictors of Change in Relationship Satisfaction during the Transition to Parenthood: Predictors of Change in Relationship Satisfaction. *Family Relations*, *63*(5), 667–679. <https://doi.org/10.1111/fare.12089>
- Tucker, P., & Aron, A. (1993). Passionate Love and Marital Satisfaction at Key Transition Points in the Family Life Cycle. *Journal of Social and Clinical Psychology*, *12*(2), 135–147. <https://doi.org/10.1521/jscp.1993.12.2.135>
- van Egeren, L. A. (2004). The development of the coparenting relationship over the transition to parenthood. *Infant Mental Health Journal*, *25*(5), 453–477. <https://doi.org/10.1002/imhj.20019>

Wright, P. J., Henggeler, S. W., & Craig, L. (1986). Problems in paradise?: A longitudinal examination of the transition to parenthood. *Journal of Applied Developmental Psychology*, 7(3), 277–291. [https://doi.org/10.1016/0193-3973\(86\)90035-3](https://doi.org/10.1016/0193-3973(86)90035-3)
